# Supplementary material
Source: Springer Nature journal article supplement (https://www.springermedizin.de/resource/supplementary/13041_2013_248_MOESM3_ESM.pdf/25657870)

**A****WT**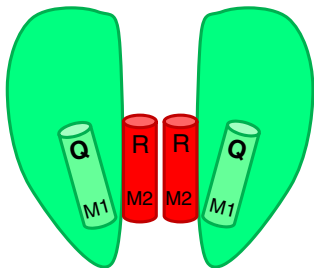

activation  
by glycine

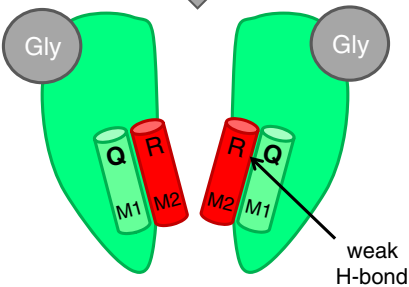**B****Q226E**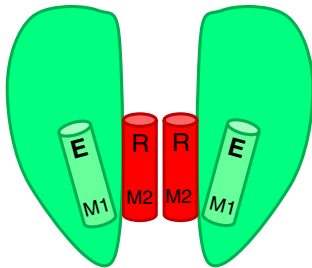

spontaneous  
openings

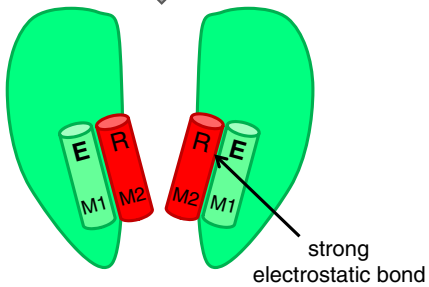

Supplement: MOESM3 [file 25657870]
